# Supplementary material for: Phenanthridine–pyrene conjugates as fluorescent probes for DNA/RNA and an inactive mutant of dipeptidyl peptidase enzyme
Source: publisher site journal article supplement (doi:10.3762/bjoc.19.40), 2023-04-26
Supplement: Additional file 1 [file 1860-5397-19-40-S1.pdf]

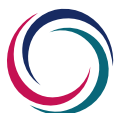

## Supporting Information

for

### **Phenanthridine–pyrene conjugates as fluorescent probes for DNA/RNA and an inactive mutant of dipeptidyl peptidase enzyme**

Josipa Matić, Tana Tandarić, Marijana Radić Stojković, Filip Šupljika, Zrinka Karačić, Ana Tomašić Paić, Lucija Horvat, Robert Vianello and Lidija-Marija Tumir

*Beilstein J. Org. Chem.* **2023**, *19*, 550–565. [doi:10.3762/bjoc.19.40](https://doi.org/10.3762/bjoc.19.40)

## Additional experimental data

## Content

1. Spectroscopic properties of **Phen-Py-1** and **Phen-Py-2**
2. Interactions of **Phen-Py-1** and **Phen-Py-2** with DNA/RNA and protein
3. NMR spectra of **Phen-Py-1** and **Phen-Py-2**
4. Computational analysis
5. Confocal microscopy

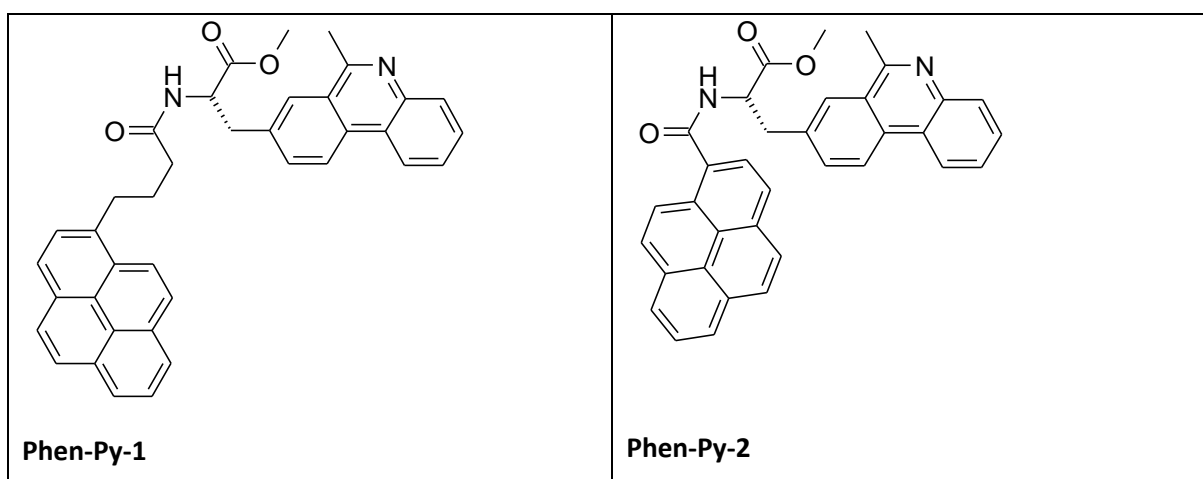

Scheme 1. Structures of examined **Phen-Py-1** and **-2**.

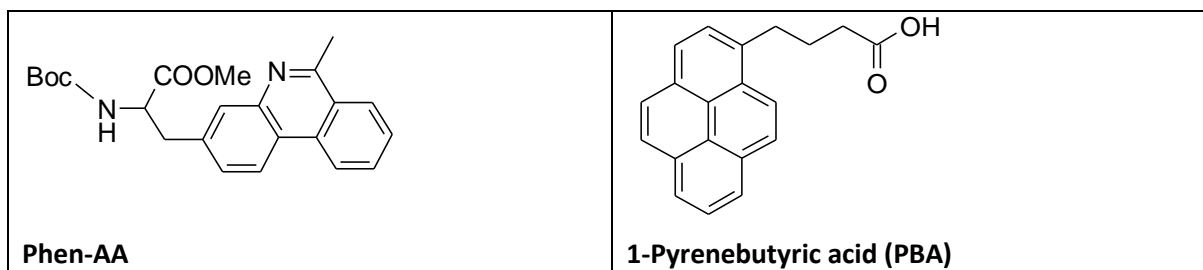

Scheme 2. Structures of reference compounds.

### 1. Spectroscopic properties of **Phen-Py-1** and **-2**

Studied compounds were moderately soluble in DMSO (up to  $c = 1 \times 10^{-3} \text{ mol dm}^{-3}$ ). DMSO stock solutions of compounds were stable during few months. All measurements were recorded in Na-cacodylate buffer ( $I_c = 0.05 \text{ mol dm}^{-3}$ ) both at pH 5.0 and pH 7.0. Volume ratio of DMSO was less than 1% in all measurements.

UV-vis spectra of examined compounds were recorded in Na-cacodylate buffer ( $I_c = 0.05 \text{ mol dm}^{-3}$ ) both at pH 5 and pH 7. Further, spectra were recorded using immersion probe with 5 cm light path length, which allowed measurements at concentration range  $5 \times 10^{-7} - 3 \times 10^{-6} \text{ mol dm}^{-3}$  to avoid self-aggregation. Absorbancies of aqueous solutions of compounds **Phen-Py-1** and **2** were proportional to their concentrations up to concentrations  $c = 3 \times 10^{-6} \text{ mol dm}^{-3}$ . Thermal dependent UV-vis spectra

were recorded using quartz cuvettes (1 cm path). UV–vis spectra of aqueous solutions of examined compounds **1–2** showed minor irreversible changes upon heating that were attributed to precipitation. Absorption maxima and corresponding molar extinction coefficients ( $\epsilon$ ) were given in Table 1 and Figure S1.

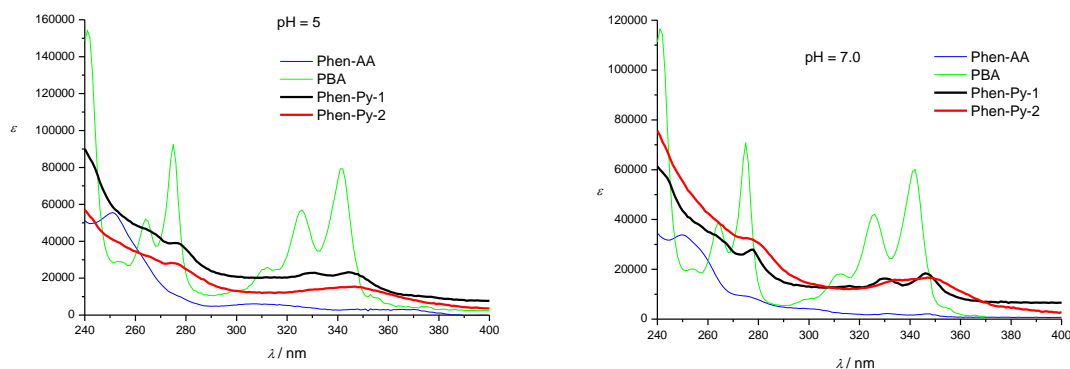

Figure S1. UV–vis spectra of **Phen-Py-1** and **2** and reference compounds **Phen-AA** and **PBA** at pH 5 and pH 7

Fluorescence emission of **Phen-Py-1** and **-2** measured at pH 5 and pH 7 (cacodylate buffer,  $I_c = 0.05 \text{ mol dm}^{-3}$ ) was linearly dependent on the concentration up to  $3 \times 10^{-6} \text{ mol dm}^{-3}$  (Figure S2). Fluorescence intensity was decreased upon time and also upon temperature increase without reproducibility after cooling back. That was attributed to the temperature-induced unstacking of phenanthridine and pyrene but also aggregation/precipitation of the compounds.

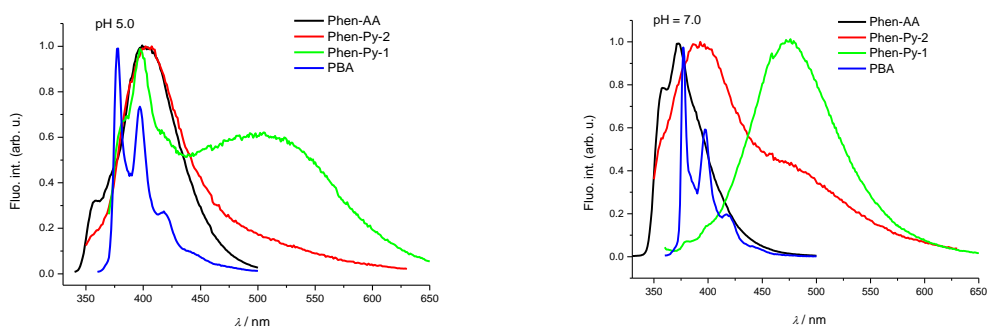

Figure S2. Normalized fluorescence emission spectra of **Phen-Py-1** ( $\lambda_{\text{exc}} = 350 \text{ nm}$ ), **Phen-Py-2** ( $\lambda_{\text{exc}} = 350 \text{ nm}$ ), reference **Phen-AA** ( $\lambda_{\text{exc}} = 250 \text{ nm}$ ) and reference **PBA** ( $\lambda_{\text{exc}} = 342 \text{ nm}$ ) compounds (sodium cacodylate buffer,  $I_c = 0.05 \text{ mol dm}^{-3}$ , left: pH 5 right: pH 7)

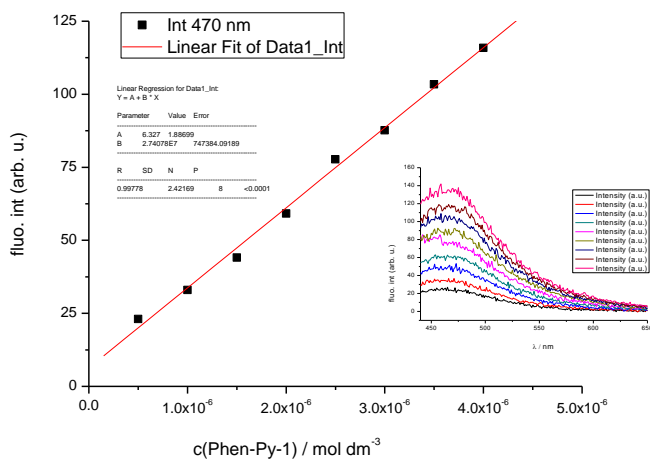

Figure S3 Linear dependence (—) of the fluorescence emission intensity of **Phen-Py-1** at 470 nm (■) Inset: Excimer emission spectra of **Phen-Py-1** ( $\lambda_{exc} = 350$  nm, sodium cacodylate buffer,  $I_c = 0.05$  mol  $dm^{-3}$ , pH 7)

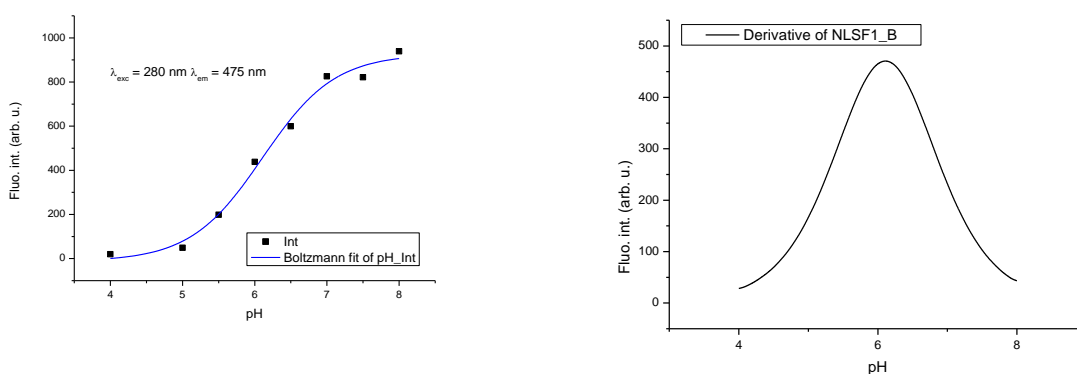

Figure S4. Left: Fluorescence emission spectra ( $\lambda_{exc} = 280$  nm;  $\lambda_{em} = 475$  nm) of **Phen-Py-1** ( $c = 2 \times 10^{-6}$  mol  $dm^{-3}$ ) at different pH values (Na-cacodylate, HCl,  $I_c = 0.05$  mol  $dm^{-3}$  at 25 °C); Right: First derivation of fluorescence emission at 475 nm in dependence of pH.

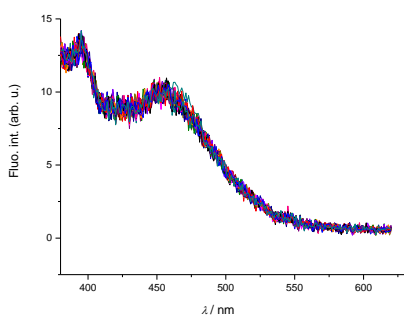

Figure S5. Fluorescence emission spectra of **Phen-Py-1** ( $c = 2 \times 10^{-6}$  mol  $dm^{-3}$ ) measured during 60 cycles every 2 minutes at 25 °C,  $\lambda_{exc} = 352$  nm in methanol.

## 2. Study of interactions of Phen-Py-1 and -2 with ds-DNA and ds-RNA in aqueous media

### 2.1. Thermal melting experiments

Non-covalent binding of small molecules to ds-polynucleotides usually has a certain effect on the thermal stability of helices thus giving different  $T_m$  values (temperature of dissociation of double stranded helix into two single stranded polynucleotides)<sup>1</sup>. Difference between  $T_m$  value of free polynucleotide and complex with a small molecule ( $\Delta T_m$  value) is an important factor in the characterisation of small molecule / ds-polynucleotide interactions. All thermal melting experiments were performed sodium cacodylate buffer, pH 7.0,  $I_c = 0.05 \text{ mol dm}^{-3}$ .

At pH 7 **Phen-Py-1** and **Phen-Py-2** didn't thermally stabilize any ds-DNA/RNA (Table S1, Figure S6-S8).

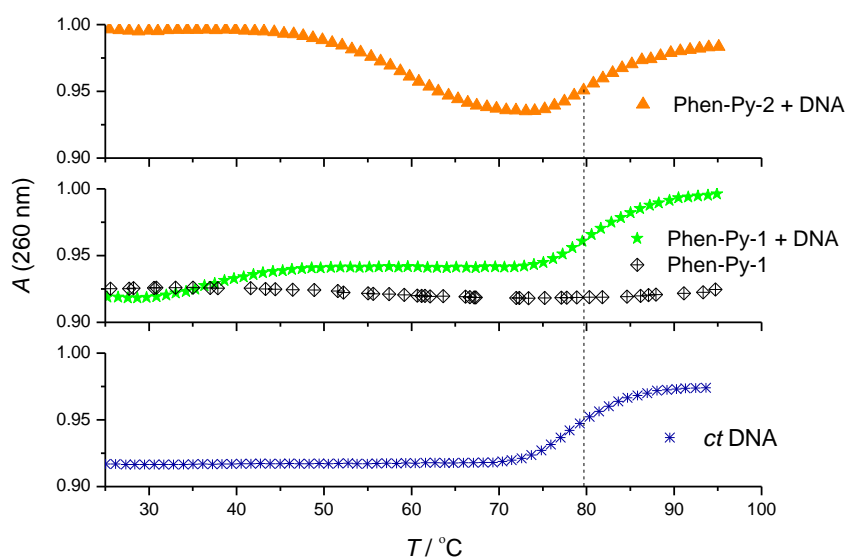

Figure S6. Melting curves of **Phen-Py-1** ( $c = 5 \times 10^{-6} \text{ mol dm}^{-3}$ ) and ct-DNA upon addition of **Phen-Py-1** and **Phen-Py-2** ( $c(\text{DNA}) = 2 \times 10^{-5} \text{ mol dm}^{-3}$ ; ratio  $r[\text{compound}] / [\text{polynucleotide}] = 0.3$ ) at pH 7.0 (sodium cacodylate buffer,  $I_c = 0.05 \text{ mol dm}^{-3}$ ).

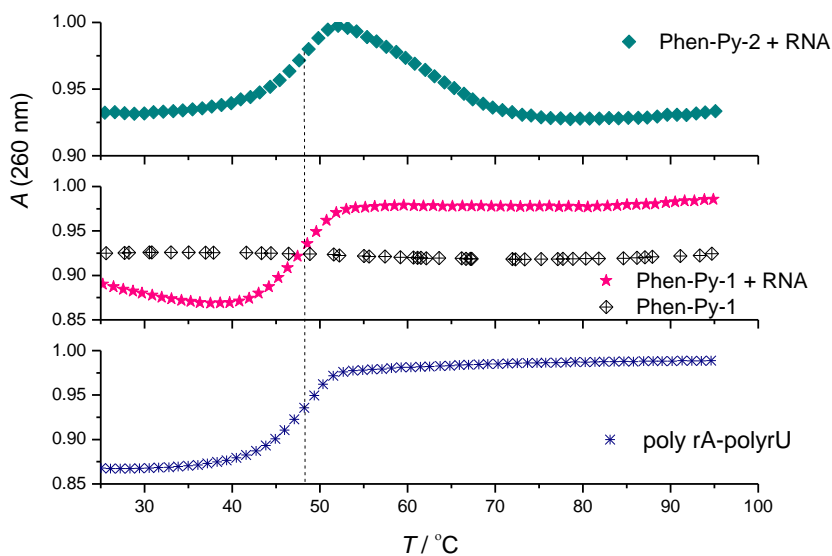

Figure S7. Melting curves of **Phen-Py-1** ( $c = 5 \times 10^{-6} \text{ mol dm}^{-3}$ ) and poly rA-poly rU upon addition of **Phen-Py-1** and **Phen-Py-2** ( $c(\text{RNA}) = 2 \times 10^{-5} \text{ mol dm}^{-3}$ ; ratio  $r[\text{compound}] / [\text{polynucleotide}] = 0.3$ ) at pH 7.0 (sodium cacodylate buffer,  $I_c = 0.05 \text{ mol dm}^{-3}$ ).

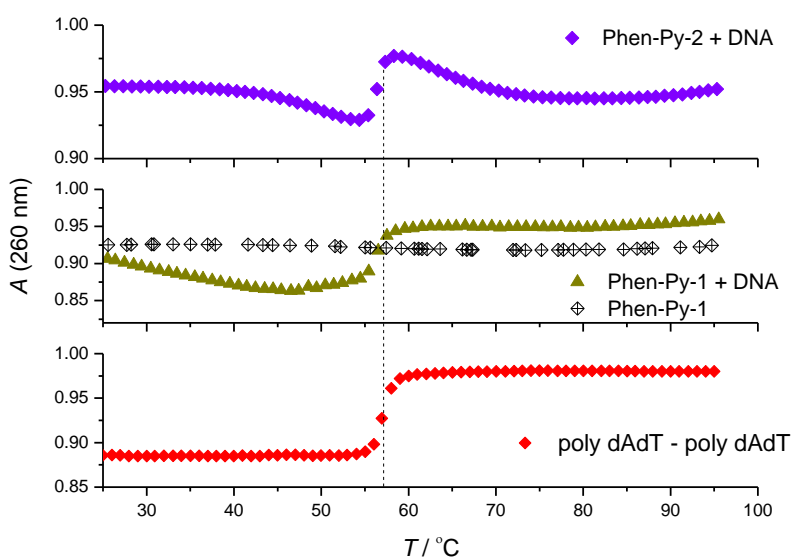

Figure S8. Melting curves of **Phen-Py-1** ( $c = 5 \times 10^{-6} \text{ mol dm}^{-3}$ ) and poly dAdT – poly dAdT upon addition of **Phen-Py-1** and **Phen-Py-2** ( $c(\text{DNA}) = 2 \times 10^{-5} \text{ mol dm}^{-3}$ ; ratio  $r[\text{compound}] / [\text{polynucleotide}] = 0.3$ ) at pH 7.0 (sodium cacodylate buffer,  $I_c = 0.05 \text{ mol dm}^{-3}$ ).

Table S1. The  $^a\Delta T_m$  values ( $^{\circ}\text{C}$ ) of studied ds-polynucleotides upon addition of **Phen-Py-1** and **Phen-Py-2** (ratio  $r^b = 0.3$ ) at pH 7.0 (buffer sodium cacodylate,  $I_c = 0.05 \text{ mol dm}^{-3}$ ),  $c(\text{DNA} / \text{RNA}) = 1-2 \times 10^{-5} \text{ mol dm}^{-3}$ .

| Compound         | $\Delta T_m / ^{\circ}\text{C}$ |                       |                   |
|------------------|---------------------------------|-----------------------|-------------------|
|                  | ct-DNA                          | poly dAdT – poly dAdT | poly rA – poly rU |
| <b>Phen-Py-1</b> | 0                               | 0                     | 0                 |
| <b>Phen-Py-2</b> | precipitation                   | 0                     | precipitation     |

<sup>a</sup> Error in  $\Delta T_m : \pm 0.5^{\circ}\text{C}$ ;

<sup>b</sup>  $r = [\text{compound}] / [\text{polynucleotide}]$ ;

<sup>d</sup> not determined due to precipitation

## 2.1. Spectrophotometric titrations

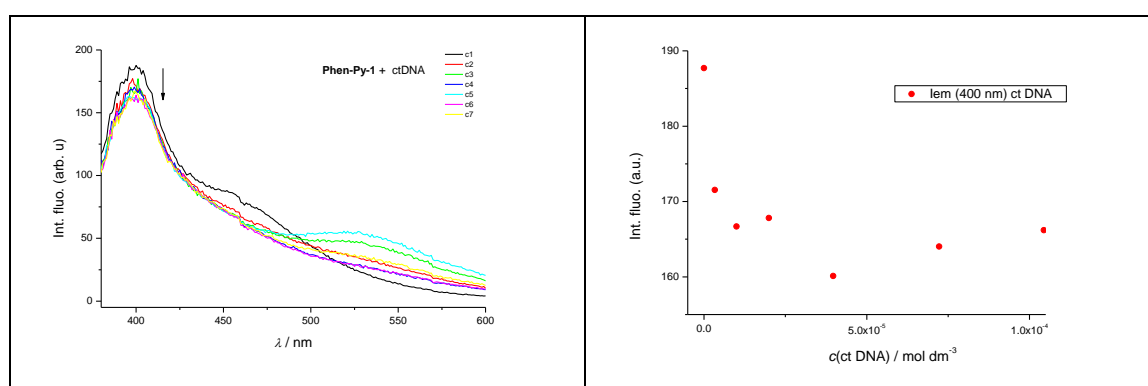

Figure S9. Left: Fluorimetric titration of **Phen-Py-1** with ct-DNA,  $\lambda_{exc} = 352 \text{ nm}$ ,  $c = 2 \times 10^{-6} \text{ mol dm}^{-3}$ , Right: Experimental ( $\bullet$ ) fluorescence intensities of **Phen-Py-1** at  $\lambda_{em} = 400 \text{ nm}$  upon addition of ct-DNA (pH 5.0, Na cacodylate buffer,  $I_c = 0.05 \text{ mol dm}^{-3}$ ).

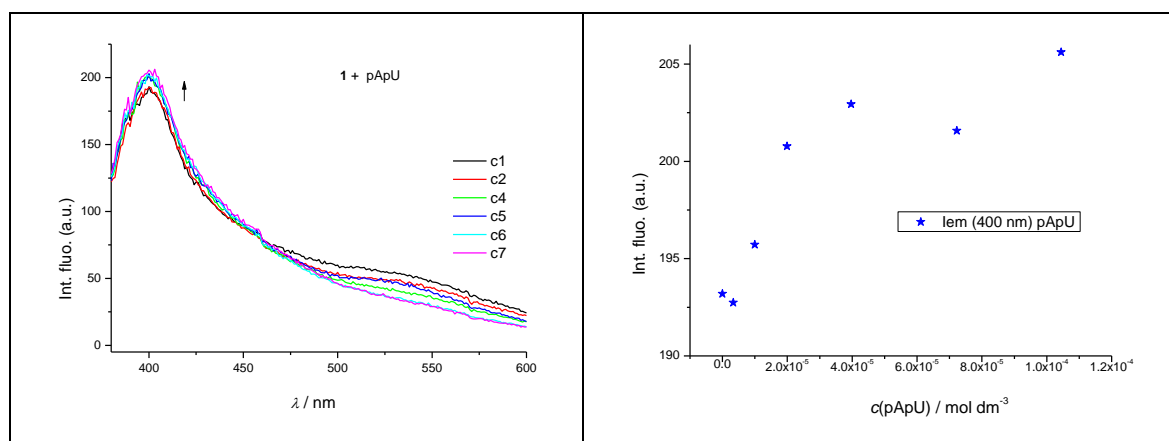

Figure S10. Left: Fluorimetric titration of **Phen-Py-1**,  $\lambda_{exc} = 352 \text{ nm}$ ,  $c = 2 \times 10^{-6} \text{ mol dm}^{-3}$  with poly rA-poly rU, Right: Experimental ( $\bullet$ ) fluorescence intensities of **Phen-Py-1** at  $\lambda_{em} = 400 \text{ nm}$  upon addition of poly rA-poly rU (pH 5.0, Na cacodylate buffer,  $I_c = 0.05 \text{ mol dm}^{-3}$ ).

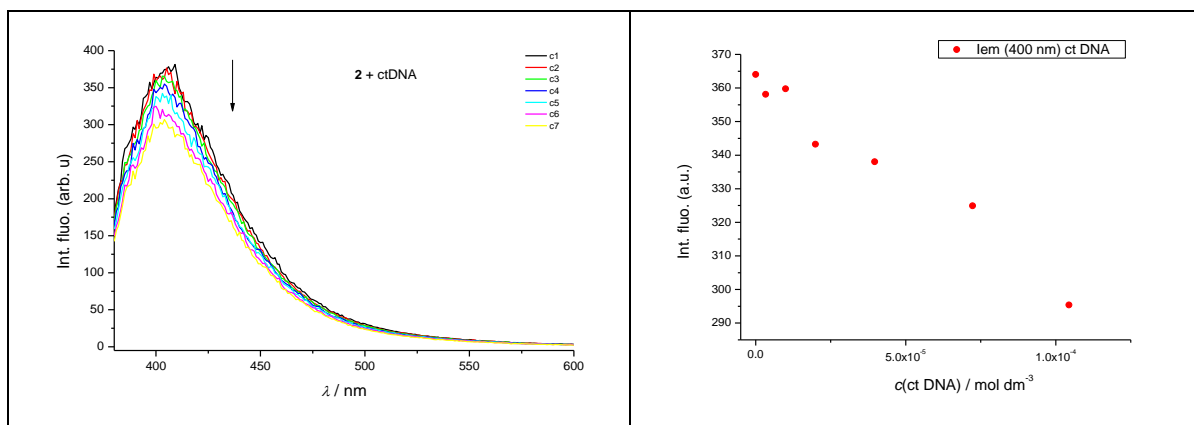

Figure S11. Left: Fluorimetric titration of **Phen-Py-2**,  $\lambda_{\text{exc}} = 352$  nm,  $c = 2 \times 10^{-6}$  mol dm<sup>-3</sup> with *ct*-DNA, Right: Experimental (●) fluorescence intensities of **Phen-Py-2** at  $\lambda_{\text{em}} = 400$  nm upon addition of *ct*-DNA (**pH 5.0**, Na cacodylate buffer,  $I_c = 0.05$  mol dm<sup>-3</sup>).

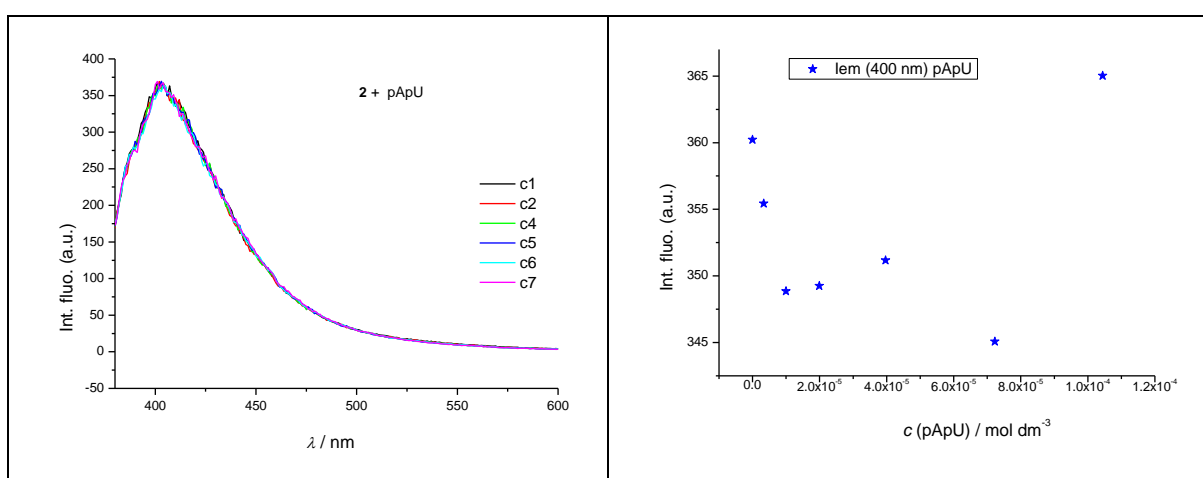

Figure S12. Left: Fluorimetric titration of **Phen-Py-2**,  $\lambda_{\text{exc}} = 352$  nm,  $c = 2 \times 10^{-6}$  mol dm<sup>-3</sup> with poly rA-poly rU, Right: Experimental (●) fluorescence intensities of **Phen-Py-2** at  $\lambda_{\text{em}} = 400$  nm upon addition of poly rA-poly rU (**pH 5.0**, Na cacodylate buffer,  $I_c = 0.05$  mol dm<sup>-3</sup>).

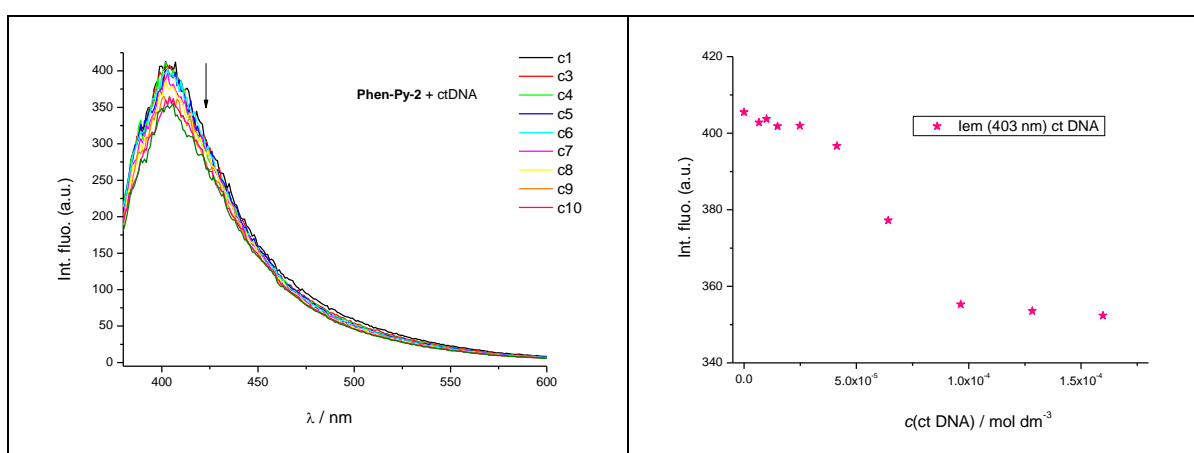

Figure S13. Left: Fluorimetric titration of **Phen-Py-2**,  $\lambda_{\text{exc}} = 352$  nm,  $c = 2 \times 10^{-6}$  mol dm<sup>-3</sup> with *ct*-DNA, Right: Experimental (●) fluorescence intensities of **Phen-Py-2** at  $\lambda_{\text{em}} = 403$  nm upon addition of *ct*-DNA (**pH 7.0**, Na cacodylate buffer,  $I_c = 0.05$  mol dm<sup>-3</sup>).



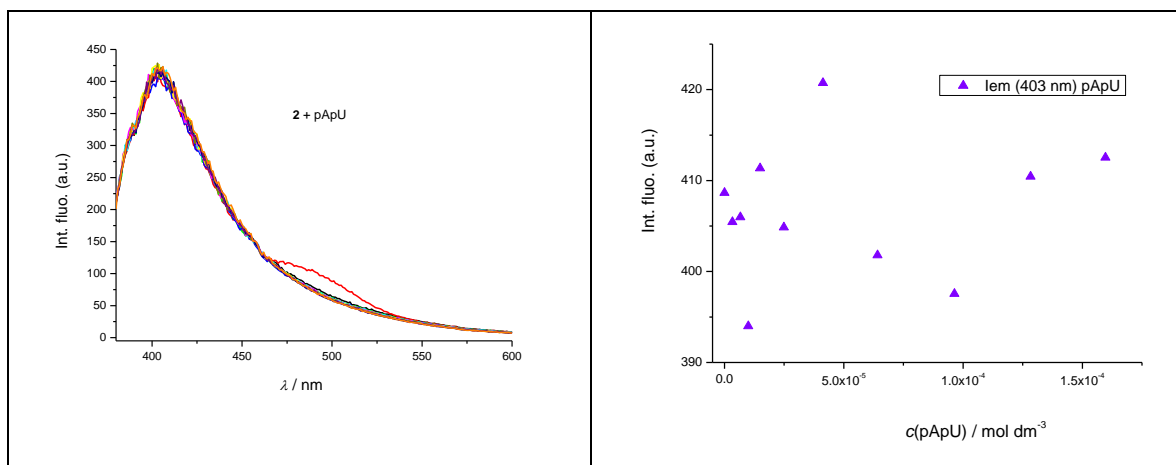

Figure S14. Left: Fluorimetric titration of **Phen-Py-2**,  $\lambda_{\text{exc}} = 352 \text{ nm}$ ,  $c = 2 \times 10^{-6} \text{ mol dm}^{-3}$  with poly rA-poly rU, Right: Experimental (●) fluorescence intensities of **Phen-Py-2** at  $\lambda_{\text{em}} = 400 \text{ nm}$  upon addition of poly rA-poly rU (pH 7.0, Na cacodylate buffer,  $I_c = 0.05 \text{ mol dm}^{-3}$ )

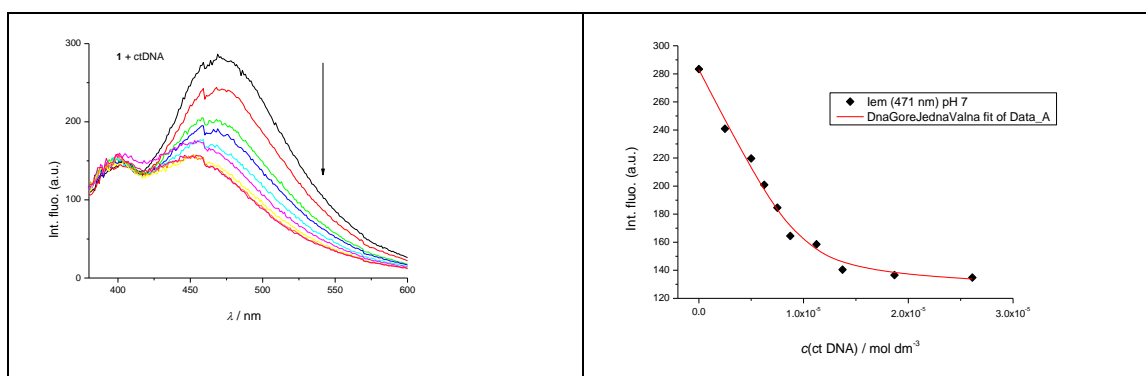

Figure S15. Left: Fluorimetric titration of **Phen-Py-1**,  $\lambda_{\text{exc}} = 352 \text{ nm}$ ,  $c = 2 \times 10^{-6} \text{ mol dm}^{-3}$  with ct-DNA, Right: Experimental (●) fluorescence intensities of **Phen-Py-1** at  $\lambda_{\text{em}} = 471 \text{ nm}$  upon addition of ct-DNA (pH 7.0, Na cacodylate buffer,  $I_c = 0.05 \text{ mol dm}^{-3}$ ).

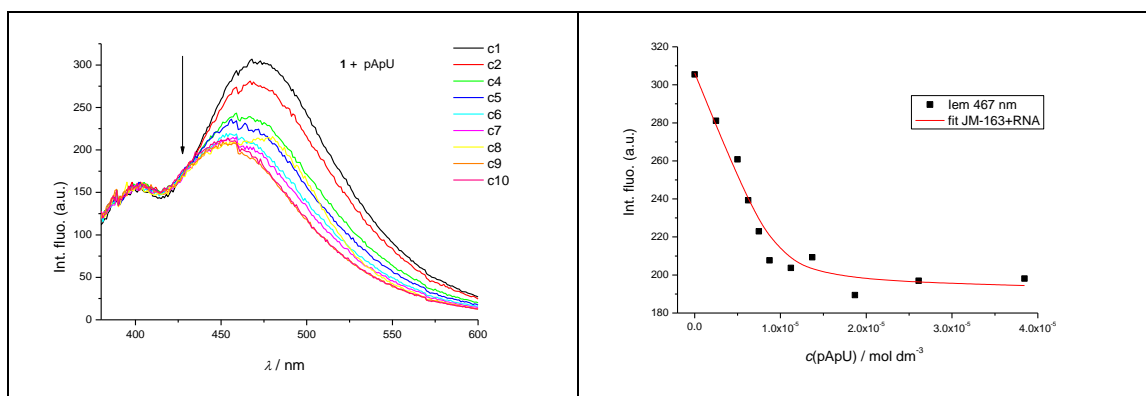

Figure S16. Left: Fluorimetric titration of **Phen-Py-1**,  $\lambda_{\text{exc}} = 352 \text{ nm}$ ,  $c = 2 \times 10^{-6} \text{ mol dm}^{-3}$  with poly rA-poly rU, Right: Experimental (●) fluorescence intensities of **Phen-Py-1** at  $\lambda_{\text{em}} = 467 \text{ nm}$  upon addition of poly rA-poly rU (pH 7.0, Na cacodylate buffer,  $I_c = 0.05 \text{ mol dm}^{-3}$ ).

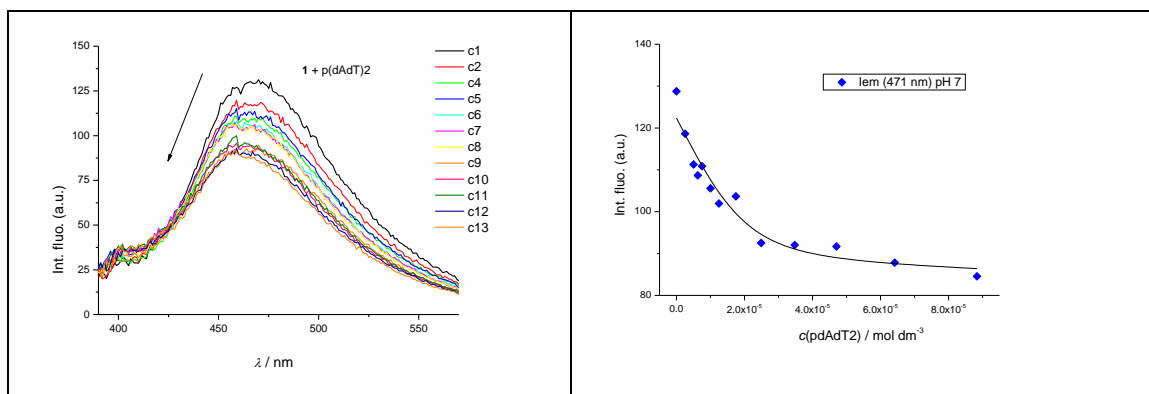

Figure S17. Left: Fluorimetric titration of **Phen-Py-1**,  $\lambda_{\text{exc}} = 352 \text{ nm}$ ,  $c = 2 \times 10^{-6} \text{ mol dm}^{-3}$  with poly dAdT - poly dAdT, Right: Experimental (●) fluorescence intensities of **Phen-Py-1** at  $\lambda_{\text{em}} = 471 \text{ nm}$  upon addition of poly dAdT - poly dAdT (pH 7.0, Na cacodylate buffer,  $I_c = 0.05 \text{ mol dm}^{-3}$ ).

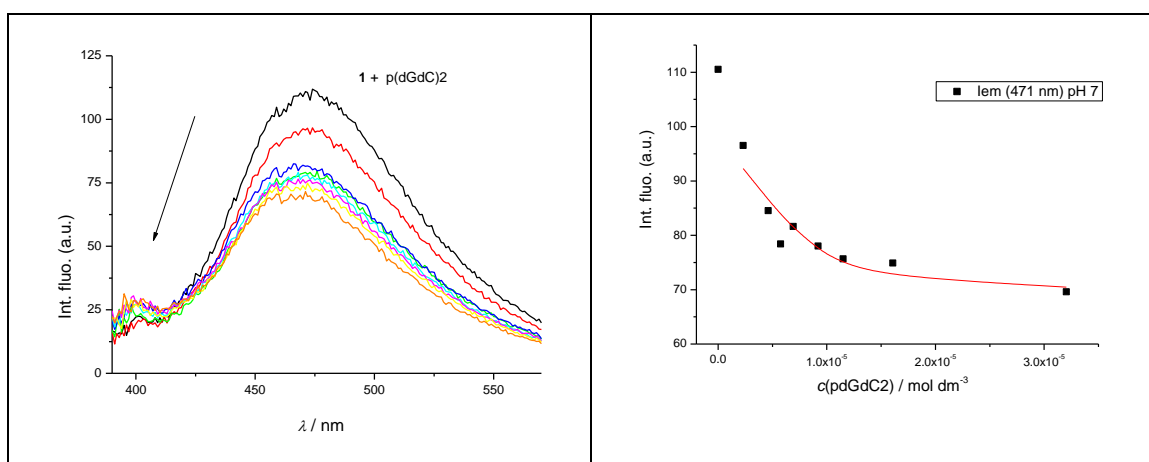

Figure S18. Left: Fluorimetric titration of **Phen-Py-1**,  $\lambda_{\text{exc}} = 352 \text{ nm}$ ,  $c = 2 \times 10^{-6} \text{ mol dm}^{-3}$  with poly dGdC - poly dGdC, Right: Experimental (●) fluorescence intensities of **Phen-Py-1** at  $\lambda_{\text{em}} = 471 \text{ nm}$  upon addition of poly dGdC - poly dGdC (pH 7.0, Na cacodylate buffer,  $I_c = 0.05 \text{ mol dm}^{-3}$ ).

### 2.3. Circular dichroism (CD) experiments

CD spectroscopy was chosen to monitor conformational changes of polynucleotide secondary structure induced by small molecule binding<sup>2</sup>. Compounds **Phen-Py-1** and **Phen-Py-2** were built using chiral amino acid building blocks and consequently have intrinsic CD spectrum.

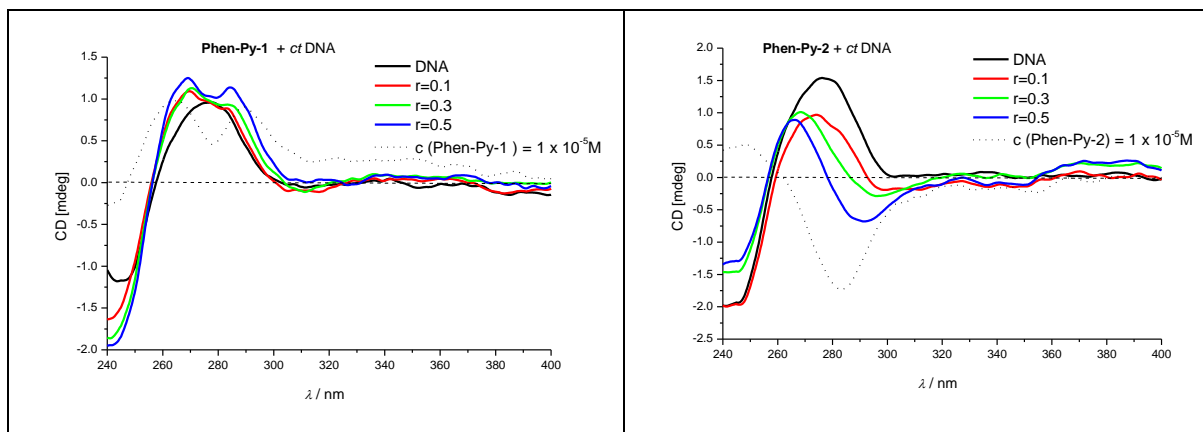

Figure S19. Changes in the CD spectrum of *ct*-DNA ( $c(\text{DNA}) = 2 \times 10^{-5} \text{ mol dm}^{-3}$ ) upon addition of **Phen-Py-1** (left) and **Phen-Py-2** (right) at different molar ratios  $r = [\text{compound}] / [\text{polynucleotide}]$ , pH 7.0, sodium cacodylate buffer,  $I_c = 0.05 \text{ mol dm}^{-3}$

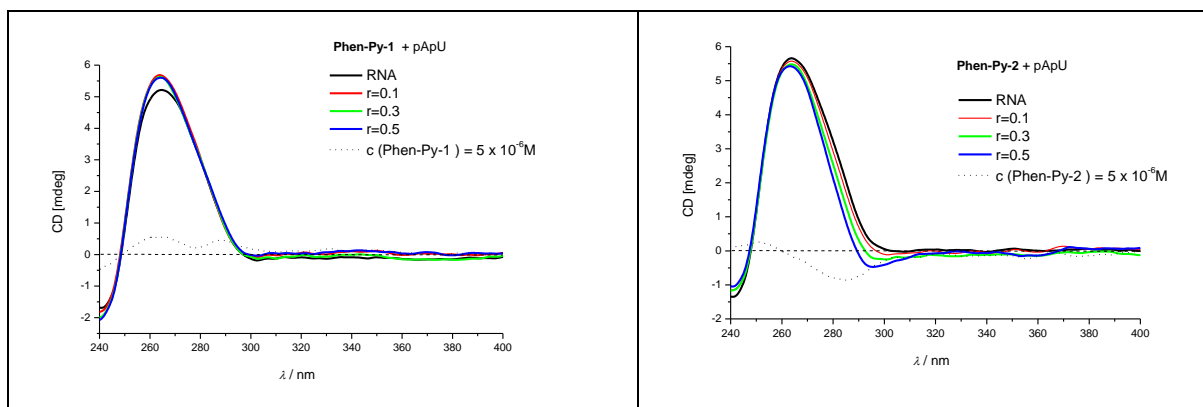

Figure S20. Changes in the CD spectrum of poly rA-poly rU upon addition of **Phen-Py-1** ( $c(\text{RNA}) = 1 \times 10^{-5} \text{ mol dm}^{-3}$ ) (left) and **Phen-Py-2**; ( $c(\text{RNA}) = 1 \times 10^{-5} \text{ mol dm}^{-3}$ ) (right) at different molar ratios  $r = [\text{compound}] / [\text{polynucleotide}]$ , pH 7.0, sodium cacodylate buffer,  $I_c = 0.05 \text{ mol dm}^{-3}$

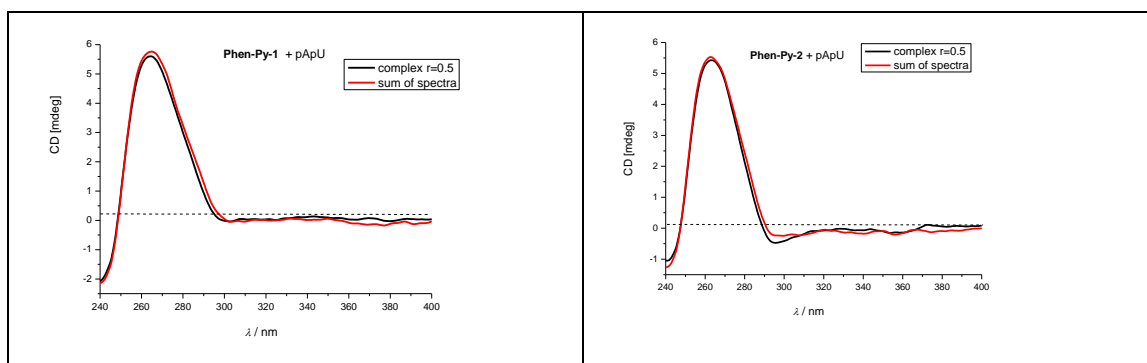

Figure S21. Comparison of spectra of RNA-dye complex ( $r = 0.5$ , —) and sum of poly rA-poly rU and dye spectra (—) of appropriate concentrations

### 3. NMR spectra of **Phen-Py-1** and **Phen-Py-2**

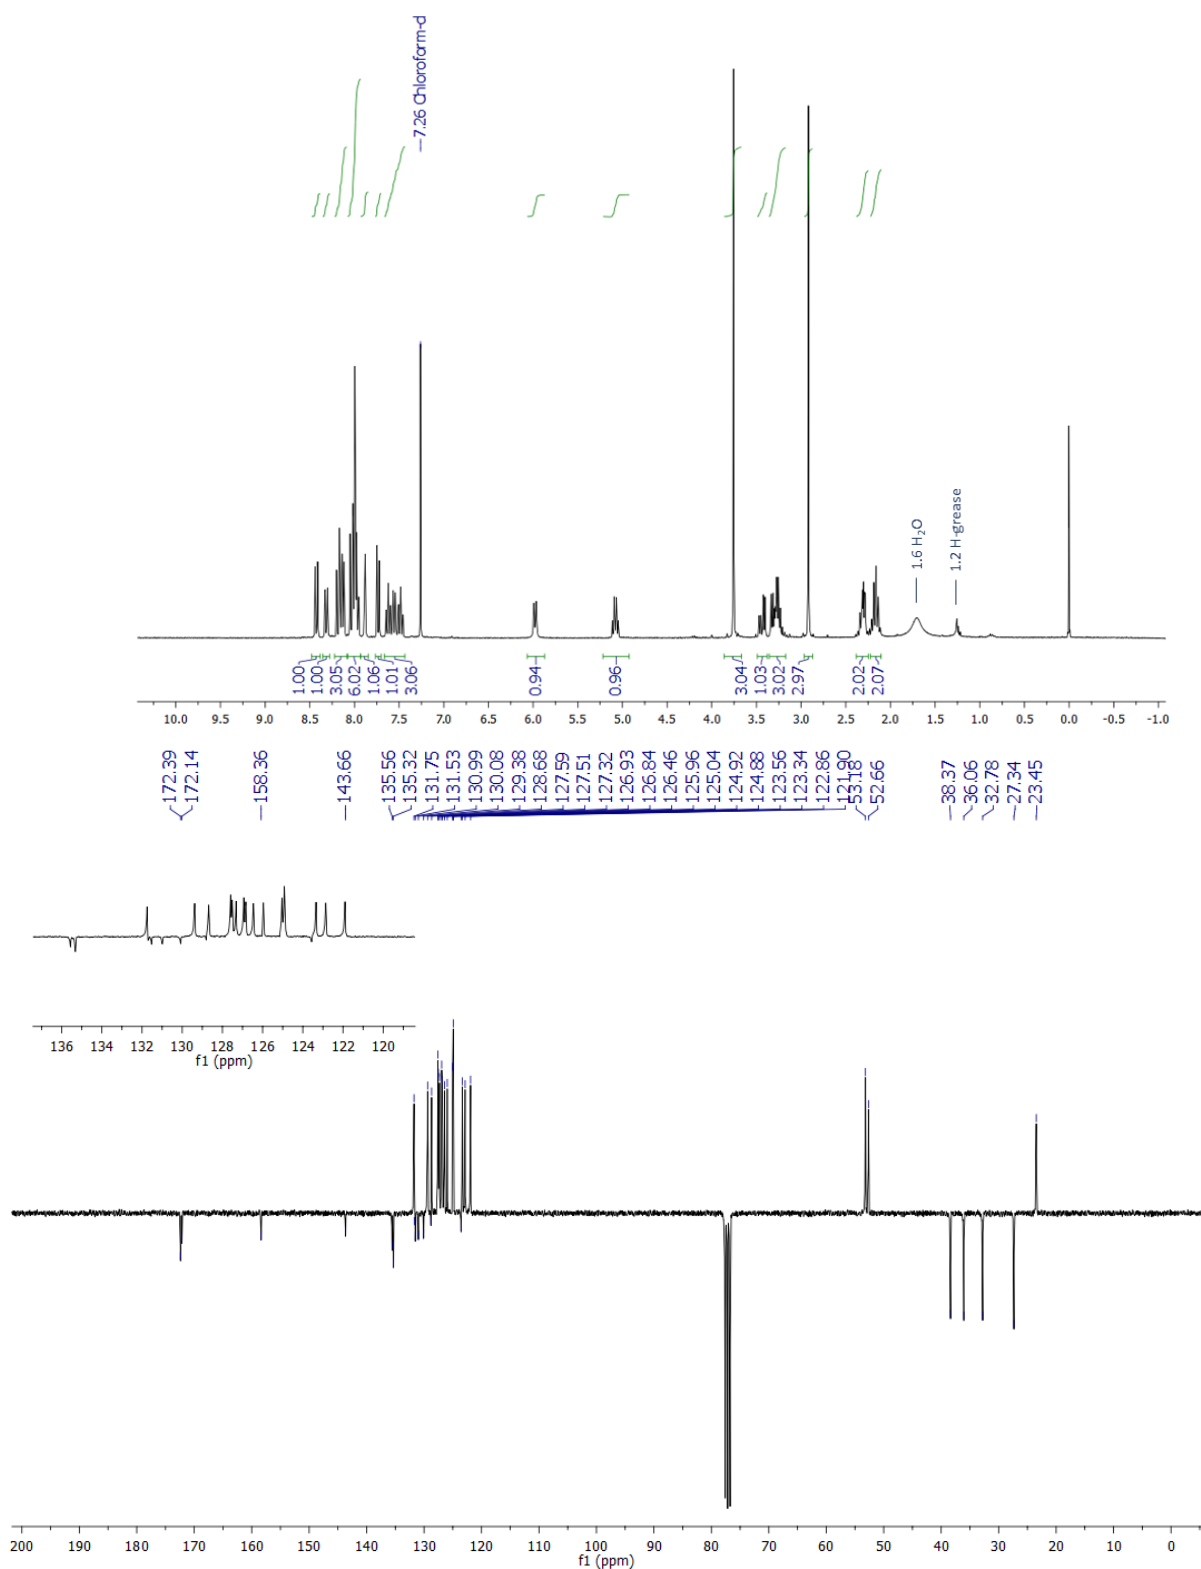

Figure S22. <sup>1</sup>H and <sup>13</sup>C NMR (APT) spectra of **Phen-Py-1**.

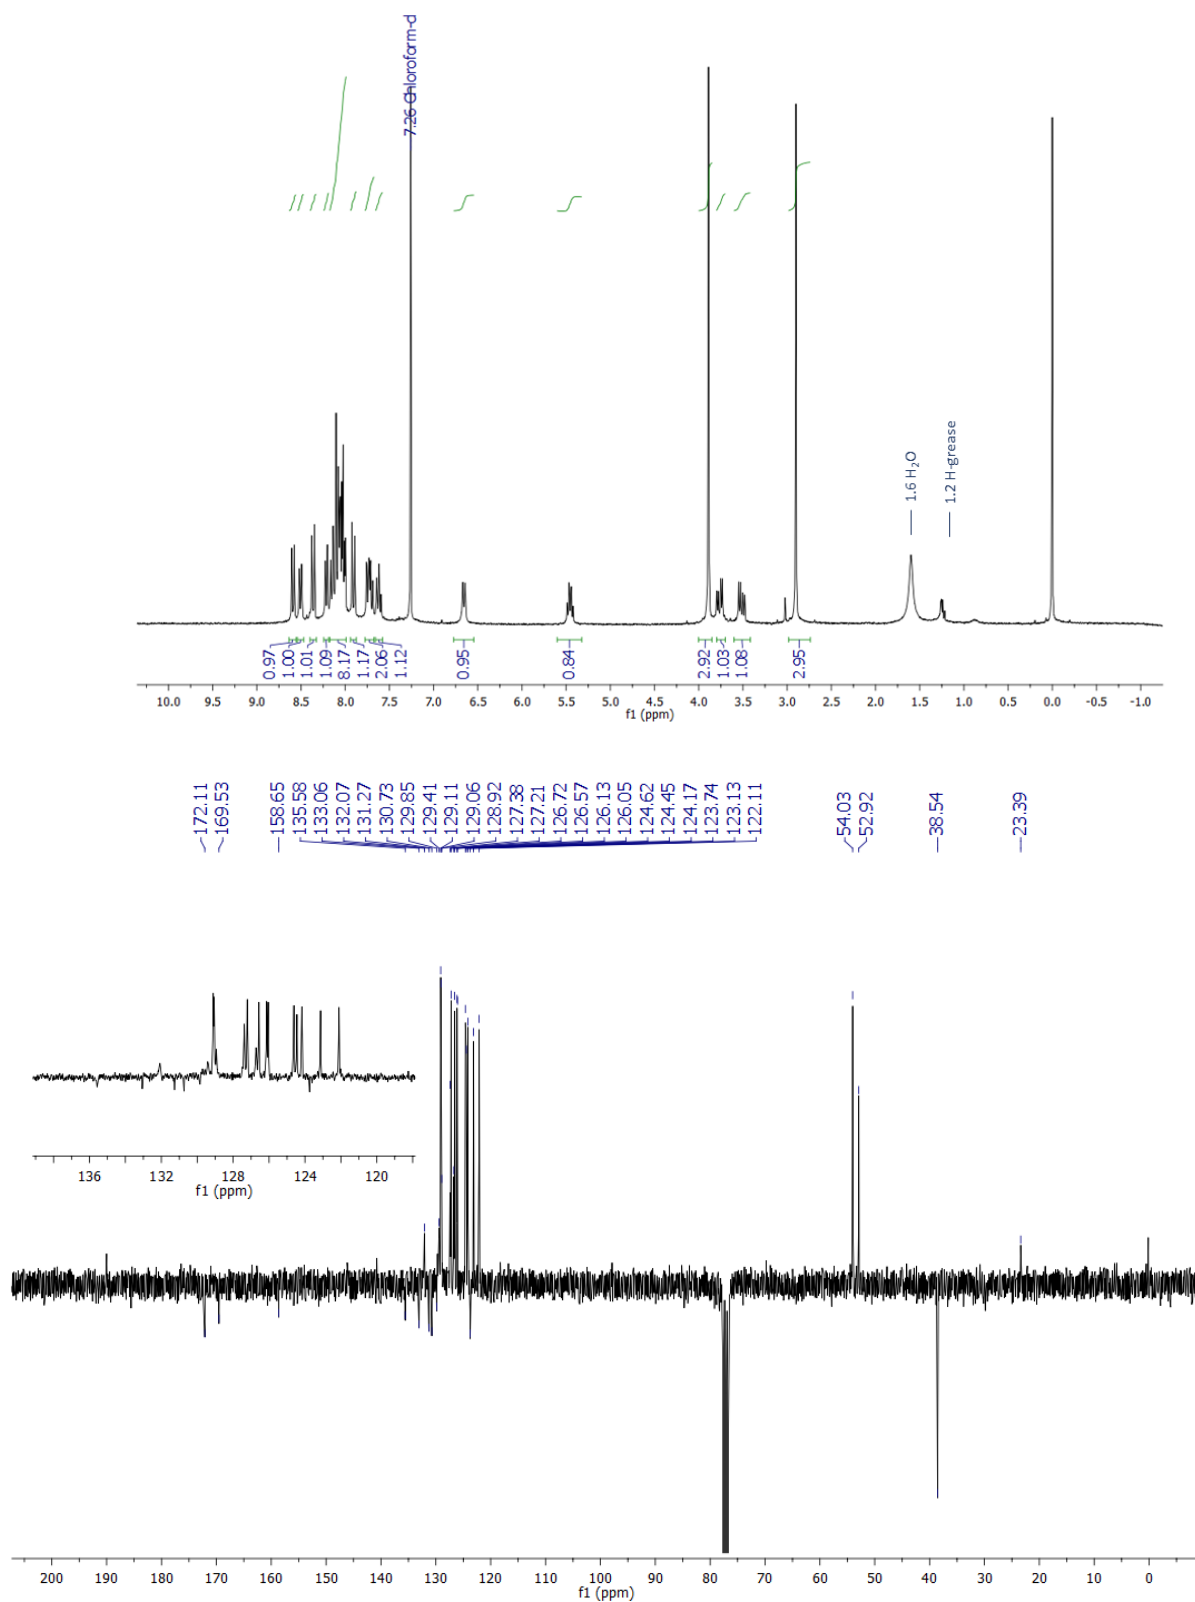

Figure S23. <sup>1</sup>H and <sup>13</sup>C (APT) NMR spectra of Phen-Py-2.

#### 4. Computational analysis

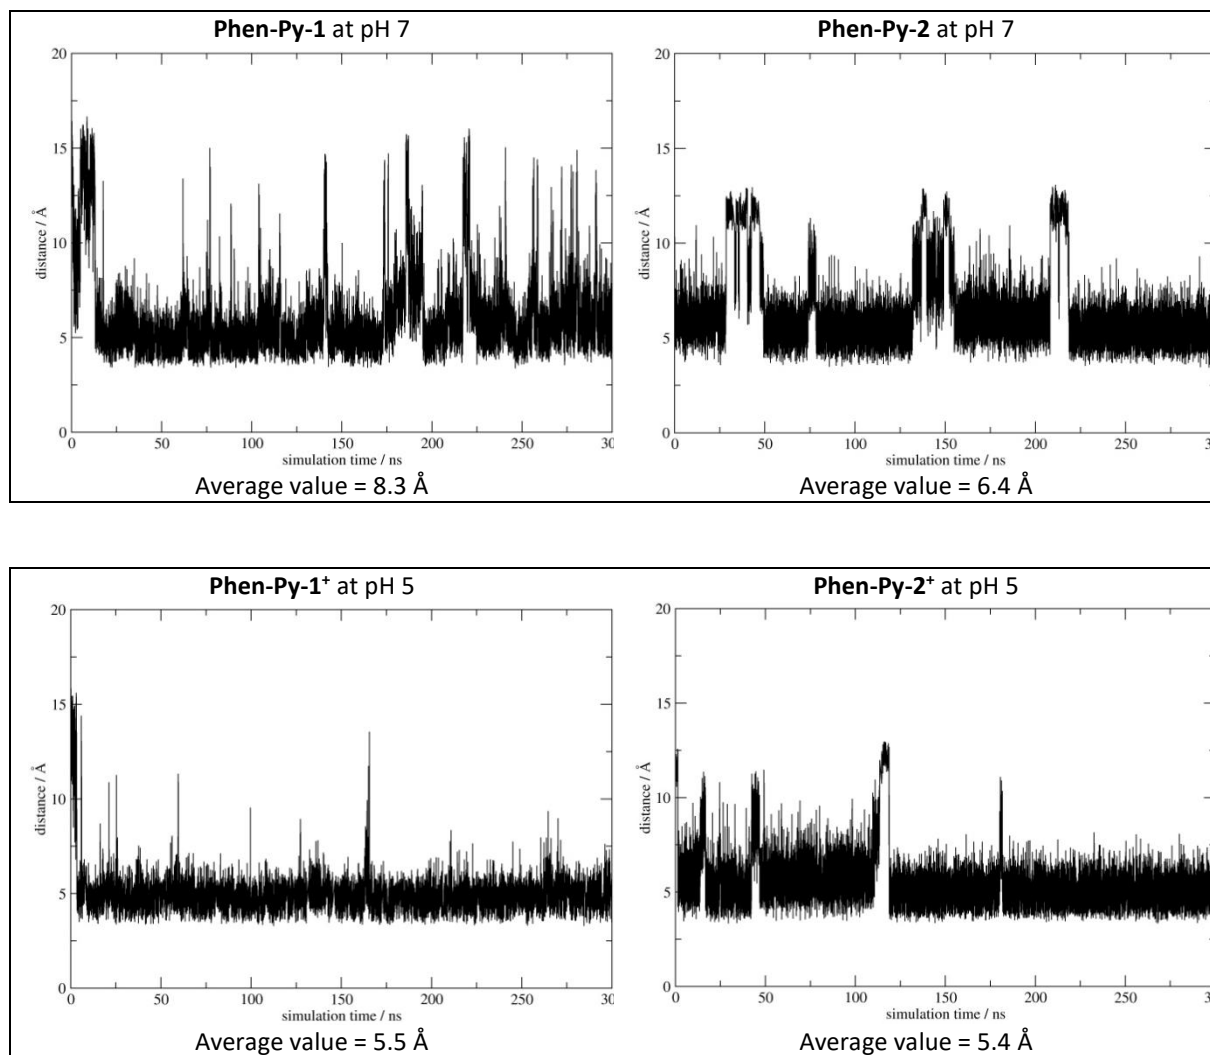

Figure S24. Evolution of distances between the centers of mass among pyrene and phenanthridine aromatic units during 300 ns of MD simulations in **Phen-Py-1** and **-2** conjugates under neutral (pH 7) and acidic (pH 5) conditions.

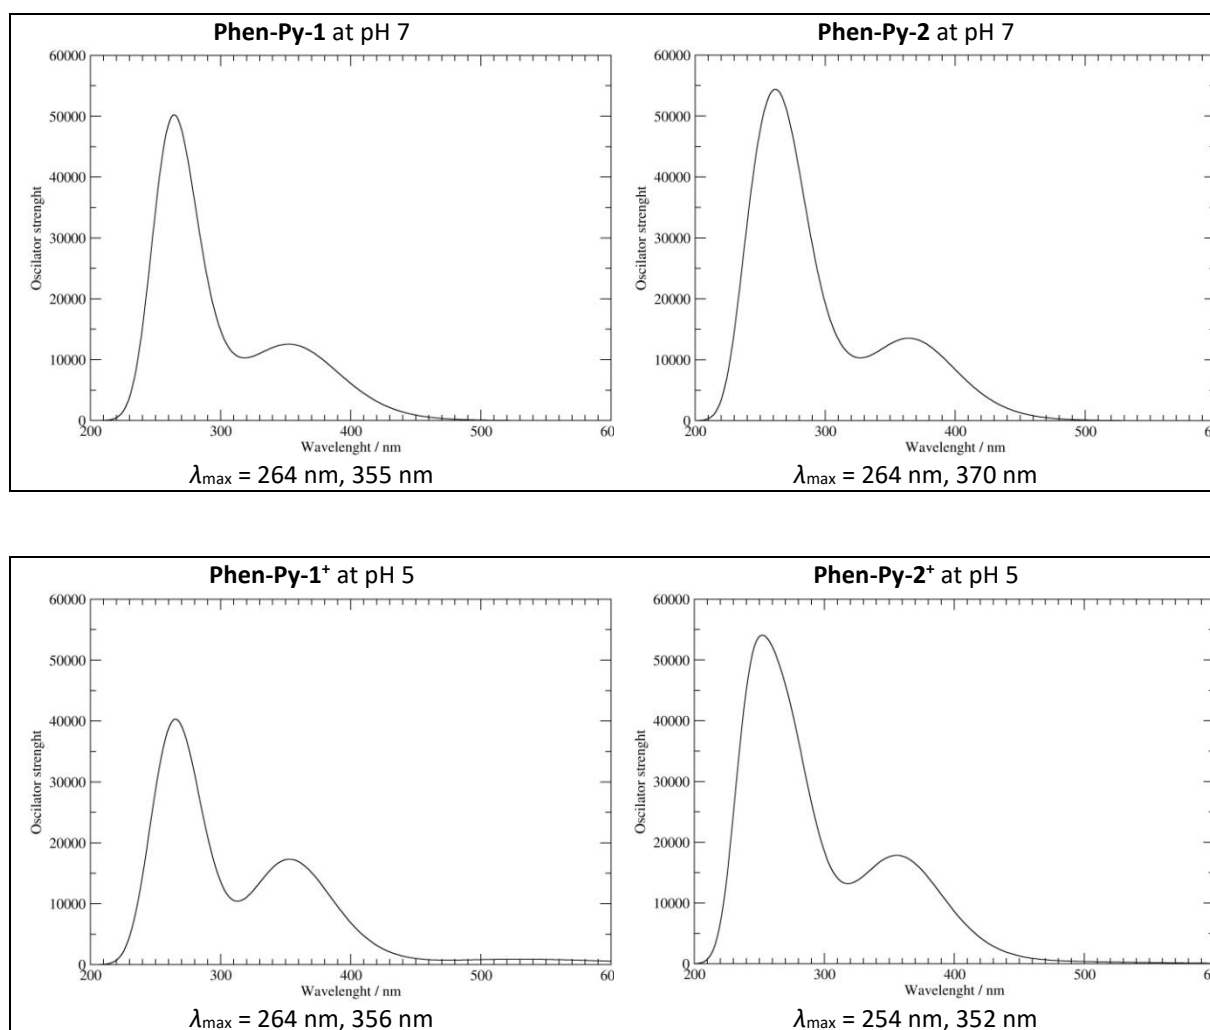

Figure S25. Calculated UV-Vis absorption spectra for **Phen-Py-1-2** conjugates under neutral (pH 7) and acidic (pH 5) conditions using the TD-DFT approach and the (IEF-PCM)/M06-2X/6-31+G(d) level of theory.

## 5. Confocal microscopy

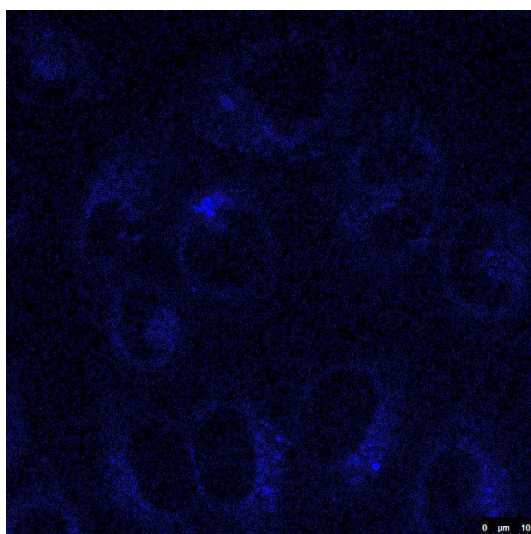

Figure S26. Live-cell image showing accumulation of **Phen-Py-1** dye (blue, 1  $\mu$ M) in HeLa cells. Cells were treated with 1  $\mu$ M of the compound and incubated for 60 min in 5% CO<sub>2</sub> at 37 °C. Scale bars, 10  $\mu$ m. The **Phen-Py-1** dye excitation and emission profiles were previously measured and applied for confocal imaging.

### Supporting Information References

---

<sup>1</sup> Mergny, J. L. and L. Lacroix (2003). "Analysis of thermal melting curves." *Oligonucleotides* **13**(6): 515-537.

<sup>2</sup> Rodger A., Norden B., In *Circular Dichroism and Linear Dichroism*; Oxford University Press: New York, 1997, Chapter 2.
